# Supplementary material for: Specific metabolites drive the deterministic assembly of diseased rhizosphere microbiome through weakening microbial degradation of autotoxin
Source: Microbiome. 2022 Oct 21;10:177. doi: 10.1186/s40168-022-01375-z (PMC9587672; doi:10.1186/s40168-022-01375-z)
Supplement: Supplementary file 3 — Additional file 2: Supplementary Table 1. Sampling information for diseased and healthy rhizosphere soils. Supplementary Table 2. Basic sequencing data for other reports integrated into our study. Supplementary Table 3. Soil chemical properties of the two soils used for the conditioned soil experiment. Supplementary Table 4. Selected different threshold (thresholda/b: represent selected the metabolites with the relative abundance greater/less than threshold for model 1/model2 construction) for model construction. Supplementary Table 5. Grouping of metabolites according to their chemical properties. Supplementary Table 6. Pairwise Adonis for multiple pairwise comparisons of rhizosphere metabolites. Supplementary Table 7. Total of 46 metabolites were significant difference and also in the best biomarkers identified by the random forest classifier between the two groups. [file 40168_2022_1375_MOESM2_ESM.xlsx]

## Sheet: Supplementary_Table1
ID	plant	health sample number	disease sample number	sample site	geo_yN	geo_xE
N1	banana	5	5	hainan	19.05	109.6
N2	cucumber	5	5	guangdong	23.34	113.16
N3	watermalon	5	5	beijing	39.52	116.64
N4	Lily	5	5	hunan	26.38	111.61

## Sheet: Supplementary_Table2
NO	plant	SEQ_REGION	geo_y	geo_x	title	time	country	UP_Seq_ID	seq_line	database
No1	flax	Unknow	43.88	4.86	Comparative Microbiome Analysis of a Fusarium Wilt Suppressive Soil and a Fusarium Wilt Conducive Soil From the Chateaurenard Region	2018	Netherlands	PRJEB24081	454 GS FLX Titanium	EUI
No2	straberry	V4-V5	31.95	119.01	Contrasting beneficial and pathogenic microbial communities across consecutive cropping fields of greenhouse strawberry	2018	China	PRJNA371508	Illumina MiSeq	NCBI
No16	Ginseng	V1-V3	42.26	127.29	Manipulation of microbial community in the rhizosphere alleviates the replanting issues in Panax ginseng	2018	China	SRP094728	Illumina HiSeq	NCBI
No31	banana	V4-V5	19.067	109.267	Rhizosphere microbial community manipulated by 2 years of consecutive biofertilizer application associated with banana Fusarium wilt disease suppression	2015	China	DRA002434	Roche 454 GS-FLX	DDBJ
No37	watermelon	V3-V4	37.68	112.79	Manipulation of the rhizosphere microbial community through application of a new bioorganic fertilizer improves watermelon quality and health	2018	China	PRJNA386438	Illumina MiSeq	NCBI
No51	maize	V4	44.3167	-96.7667	Previous crop and rotation history efects on maize seedling health and associated rhizosphere microbiome	2017	USA	PRJNA385957	Illumina MiSeq	NCBI
No59	banana	V4-V5	19	110.13	Inducing the rhizosphere microbiome by biofertilizer application to suppress banana Fusarium wilt disease	2016	China	SRP070868	454 GS FLX Titanium	NCBI
No65	Rehmannia glutinosa	V5-V7	32.93	112.967	Barcoded Pyrosequencing Reveals a Shift in the Bacterial Community in the Rhizosphere and Rhizoplane of Rehmannia glutinosa under Consecutive Monoculture	2019	China	SRP134246	Illumina HiSeq	NCBI
No3	unknow	Unknow	32.03	118.13	unknow	2015	China	SRP267523	Illumina MiSeq	NCBI
No136	soybean wheat	V4	-34.03	-58.05	Integrated analysis of root microbiomes of soybean and wheat from agricultural fields	2016	Argentina	PRJNA317286	454 GS FLX Titanium	NCBI
No161	ramie	V3-V4	28.16	112.55	Potential use of high-throughput sequencing of soil microbial communities for estimating the adverse effects of continuous cropping on ramie (Boehmeria nivea L. Gaud)	2018	China	SRP110558	Illumina MiSeq	NCBI
No176	Ginseng	V1-V3	42.33	126.83	Rhizospheric microbial communities are driven by Panax ginseng at different growth stages and biocontrol bacteria alleviates replanting mortality	2018	China	SRP103168	Illumina HiSeq	NCBI
No181	Zea	V4-V5	14.01	121.05	Crop Rotation and Straw Application Impact Microbial Communities in Italian and Philippine Soils and the Rhizosphere of Zea mays	2018	Italy	PRJEB23682	Illumina HiSeq	ENA
No183	millet	V4	38.55	113.96	Manure and mineral fertilization change enzyme activity and bacterial community in millet rhizosphere soils	2018	China	SRP119946	Illumina MiSeq	NCBI
No203	Cucumber	V3-V4	45.68	126.61	Rotations with Indian Mustard and Wild Rocket Suppressed Cucumber Fusarium Wilt Disease and Changed Rhizosphere Bacterial Communities	2016	China	SRP180383	Illumina MiSeq	NCBI
BW_2	tomato	V1-V3	39.53	76.23	Insect exclusion limits variation in bacterial microbiomes of tomato flowers and fruit	2018	USA	PRJNA321148	Illumina MiSeq	NCBI
BW_28	tobacco	V1-V9	30.65	109.71	Effects of Bacillus amyloliquefaciens ZM9 on bacterial wilt and rhizosphere microbial communities of tobacco	2013	China	PRJNA277904	Illumina MiSeq	NCBI
BW_41	tomato	V3-V4	35.38	129.61	Culturing Simpler and Bacterial Wilt Suppressive Microbial Communities from Tomato Rhizosphere	2017	South Korea	PRJNA553490	Illumina MiSeq	NCBI
BW_42	tobacco	V4	29	107	Using community analysis to explore bacterial indicators for disease suppression of tobacco bacterial wilt	2014	China	PRJNA275515	Illumina MiSeq	NCBI
PRJNA559787	tomato	V3-V4	36.43	129.53	Alteration of Bacterial Wilt Resistance in Tomato Plant by Microbiota Transplant	2019	South Korea	PRJNA559787	Illumina MiSeq	NCBI
PRJNA574588	tomato	V3-V4	52.45	10.93	Biocontrol of Bacterial Wilt Disease Through Complex Interaction Between Tomato Plant, Antagonists the Indigenous Rhizosphere Microbiota, and Ralstonia solanacearum	2015	South Korea	PRJNA574588	Illumina MiSeq	NCBI
PRJNA449137	tomato	V3-V4	19.63	110.8	Alternation of soil bacterial and fungal communities by tomato–rice rotation in Hainan Island in Southeast of China	2019	Germany	PRJNA449137	Illumina MiSeq	NCBI
PRJNA610155	tomato	V3-V4	38.08	114.73	Streptomyces sp. strain TOR3209: a rhizosphere bacterium promoting growth of tomato by affecting the rhizosphere microbial community	2016	China	PRJNA610155	Illumina HiSeq	NCBI
PRJNA556565	tomato	V3-V4	55.25	83.51	RHIZOSPHERE BACTERIOBIOME OF THE HUSK TOMATO GROWN IN THE OPEN FIELD IN WEST SIBERIA	2016	China	PRJNA556565	Illumina MiSeq	NCBI
PRJNA527973	tomato	V4	26.45	81.43	Impact of Soil Microbial Amendments on Tomato RhizosphereMicrobiome and Plant Growth in Field Soil	2019	Russia	PRJNA527973	Illumina MiSeq	NCBI
PRJNA383959	tomato	Unknow	35.43	127.53	A preliminary examination of bacterial, archaeal, and fungal communities inhabiting different rhizocompartments of tomato plants under real-world environments	2015	USA	PRJNA383959	Illumina MiSeq	NCBI
PRJNA445594	tomato	V4	28.28	120.71	Effects of a microbial restoration substrate on plant growthand rhizosphere bacterialcommunity in a continuous tomatocropping greenhouse	2016	South Korea	PRJNA445594	Illumina MiSeq	NCBI
PRJNA420914	tomato	V4	27.55	120.33	Bacterial community diversity associated with the severity of bacterial wilt disease in tomato fields in south-east China	2017	China	PRJNA420914	Illumina MiSeq	NCBI
PRJNA420007	tomato	V3-V4	49.18	9.35	Effects of phosphorus-mobilizing bacteria on tomato growth and soil microbial activity	2014	China	PRJNA420007	Illumina MiSeq	NCBI
ZML	tomato	V3-V4	31.71	118.76	High abundance of Ralstonia solanacearumchanged tomato rhizosphere microbiomeand metabolome	2019	Germany	SRP246782	Illumina HiSeq	NCBI
PRJNA577427	tomato	V4	32.01	118.85	Soil legacy microbiome of potassium phosphite can inhibit the tomato pathogen Ralstonia solanacearum growth under root residual condition	2019	China	PRJNA577427	Illumina HiSeq	NCBI
PRJNA625715	tomato	Unknow			unknow	2019	China	PRJNA625715	Illumina HiSeq	NCBI
PRJNA496268.	tomato	V4	38.88	94.99	unknow	2018	USA	PRJNA496268	Illumina MiSeq	NCBI
PRJNA576087	tomato	V3-V4	39.97	116.34	unknow	2017	China	PRJNA576087	Illumina HiSeq	NCBI
PRJNA540089	tobacco	V5-V6	25.79	113.03	Network analysis infers the wilt pathogen invasion associated with non-detrimental bacteria	2016	China	PRJNA540089	Illumina MiSeq	NCBI
PRJNA533499	ginger	Unknow	29.3	105.22	Soil microbial carbon metabolism and community structure reveals the pattern of disease suppression to ginger wilt in continuous mono-cropping fields	2015	China	PRJNA533499	Illumina MiSeq	NCBI
PRJNA523332	tomato	Unknow	31.136	119.97	unknow	2019	China	PRJNA523332	Illumina MiSeq	NCBI
PRJNA371772	tomato	V4	40.33	17.5	Response of Tomato Rhizosphere Bacteria to Root-Knot Nematodes, Fenamiphos and Sampling Time Shows Differential Effects on Low Level Taxa	2019	Italy	PRJNA371772	Illumina MiSeq	NCBI
PRJNA357696	tomato	V4	31.36	121.43	Effect of biocontrol agent Bacillus amyloliquefaciens SN16-1 and plant pathogen Fusarium oxysporum on tomato rhizosphere bacterial community composition	2017	China	PRJNA357696	Illumina MiSeq	NCBI
PRJNA258487	tomato	Unknow	32.05	118.95	unknow	2015	China	PRJNA258487	Illumina MiSeq	NCBI
PRJNA210690	Zingiber	Unknow	29.1	103.96	unknow	2014	China	PRJNA210690	454 GS FLX Titanium	NCBI
PRJEB40313	tomato	V3-V4	50.45	3.21	Successive plant growth amplifies genotype-specific assembly of the tomato rhizosphere microbiome	2020	Netherland	PRJEB40313	Illumina MiSeq	NCBI
PRJNA545482	tomato	V4	31.34	119.82	Rhizosphere microbiome functional diversity and pathogen invasion resistance build up during plant development	2015	China	PRJNA545482	Illumina MiSeq	NCBI
PRJNA485203	tomato	V4-V5	45.76	126.92	Intercropping with Potato-Onion Enhanced the Soil Microbial Diversity of Tomato	2016	China	PRJNA485203	Illumina MiSeq	NCBI
PRJNA313330	tomato	Unknow	31.43	118.46	soil samples from tomato mono-cropping of CK and CF treatments in 3th season and OF, BIO, BIONS treatments in 5th season	2016	China	PRJNA313330	Illumina MiSeq	NCBI

## Sheet: Supplementary_Table3
ID	pH（1:10）	NH4-N(mg/kg)	NO3-N(mg/kg)	Soil Available Potassium (mg/kg)	Available Phosphorus(mg/kg)	Organic matter content（%）
soil1	8.59	3.40005	30.083	74.8712	5.10283	0.961247
soil2	5.7	3.9615	57.2224	89.0856	4.90591	9.89219

## Sheet: Supplementary_Table4
Thresholda	Error rates of model 1	Thresholdb	Error rates of model 2
0.9	0.55	0.001	0.39
0.8	0.53	0.002	0.37
0.7	0.52	0.003	0.36
0.6	0.47	0.004	0.35
0.5	0.42	0.005	0.35
0.4	0.38	0.006	0.33
0.3	0.35	0.008	0.25
0.2	0.33	0.01	0.22
0.1	0.3	0.012	0.18
0.09	0.28	0.014	0.15
0.08	0.26	0.016	0.22
0.07	0.2	0.018	0.2
0.06	0.19	0.02	0.19
0.05	0.18	0.022	0.22
0.04	0.18	0.024	0.25
0.03	0.1	0.026	0.28
0.02	0.15	0.028	0.27
0.01	0.17	0.03	0.25
Thresholda: selected the metabolites with the relative abundance greater than threshold for model 1 construction.
Thresholdb: selected the metabolites with the relative abundance less than threshold for model 2 construction.

## Sheet: Supplementary_Table5
Metabolite name	classification
N-methylalanine	amino acids and amides
Citraconic acid	esters
Ethylamine	others
Methylamine	amino acids and amides
Metharbital	others
Carinitine	short chain carbon organic acids
Boric acid	others
Ethylene glycol	alcohols
2-hydroxyhexanoic acid	short chain carbon organic acids
1-hexanol	alcohols
2-hydroxypyrazinyl-2-propenoic acid	others
Hexanamide	amino acids and amides
D7-glucose	sugars
Piperidone	others
Linolenic acid	long chain carbon organic acids
Beta-glutamic acid	amino acids and amides
Hydroxycarbamate	amino acids and amides
Butane-2,3-diol	others
Citrulline	amino acids and amides
2-mercapto-4,6-dimethylnicotinonitrile	others
Pyruvic acid	others
2,3-dihydro-8-methoxyfuro(2,3-b)quinoline	others
Diethylcarbamic acid	short chain carbon organic acids
L-lactic acid	short chain carbon organic acids
Hexadecane	long chain carbon organic acids
Trifluoroacetamidine	others
Epsilon-caprolactam	amino acids and amides
Glycolic acid	short chain carbon organic acids
1,2-dihydroxycylohexane	amino acids and amides
2-(methylamino)ethan-1-ol	others
Enolpyruvate	esters
Biphenyl	others
Butylamine	amino acids and amides
Phenol	others
Norvaline	amino acids and amides
L-alanine	amino acids and amides
Cyanoalanine	amino acids and amides
Hydroxylamine	others
L-tryptophan	amino acids and amides
Amine	others
2-hydroxybutanoic acid	short chain carbon organic acids
Oxamic acid	amino acids and amides
L-alanine-alanine	amino acids and amides
2-furoic acid	others
Xanthine	others
3-pyridinol	others
D-ribose-5-phosphate	sugars
3-hydroxypropionic acid	others
Butyrolactam	amino acids and amides
Benzylalcohol	alcohols
3-hydroxybutyric acid	short chain carbon organic acids
Beta-hydroxymyristic acid	others
2,2'-biphenyldiol	others
N-acetyl-d-mannosamine	amino acids and amides
Glutathione	amino acids and amides
2-deoxyerythritol	alcohols
1-methyladenosine	others
2-hydroxy-2-methylbutanoic acid	short chain carbon organic acids
Dihydroxymalonic acid	short chain carbon organic acids
N-acetyl-5-hydroxytryptamine	others
3-hydroxyisovaleric acid	short chain carbon organic acids
3-aminoisobutyric acid	others
2-ketoisocaproic acid	short chain carbon organic acids
L-valine	amino acids and amides
L-glutamine	amino acids and amides
Hypoxanthine	others
Dihydroxyacetone	sugars
2-ketoadipic acid	short chain carbon organic acids
4-hydroxybutyric acid	short chain carbon organic acids
Urea	others
3-(4-hydroxyphenyl)propionic acid	others
Benzoic acid	others
Dodecanoic acid, isopropanol ester	esters
2-hydroxy-2-pentenoic acid	short chain carbon organic acids
Octanoate radical	others
Digitoxose	sugars
Ethanolamine	others
Glycerol	others
Methyl o-d-galactopyranoside	sugars
Tetracosane	others
Isocitric acid	short chain carbon organic acids
L-isoleucine	amino acids and amides
Nicotinic acid	others
L-proline	amino acids and amides
Phenylacetic acid	others
Pentobarbital	others
Glycine	amino acids and amides
Methanolphosphate	alcohols
Oleic acid	long chain carbon organic acids
1,3-dihydroxypyridine	others
Succinic acid	short chain carbon organic acids
2-methylglyceric acid	short chain carbon organic acids
Glyceric acid	short chain carbon organic acids
5-hydroxypentanoic acid	short chain carbon organic acids
Uracil	others
Hydroquinone	others
Atropine	esters
Pyrrole-2-carboxylic acid	others
Fumaric acid	amino acids and amides
Serine	amino acids and amides
Isothreonic acid	sugar acids
Pelargonic acid	long chain carbon organic acids
2-hydroxyheptanoic acid	long chain carbon organic acids
Spermine	amino acids and amides
1,5-anhydroglucitol	sugar alcohols
Resorcinol	others
L-threonine	amino acids and amides
Phytol	alcohols
Saccharopine	others
Thymine	nucleotides
1-methylgalactose	sugars
Ornithine	amino acids and amides
N-acetylornithine	amino acids and amides
Glutaric acid	short chain carbon organic acids
Cytidine-5-monophosphate	nucleotides
Tromethamine	alcohols
2-deoxy-d-erythro-pentitol	others
Beta-alanine	amino acids and amides
Putrescine	others
Methyltetrahydrophenanthrenone	others
(s)-3,4-dihydroxybutyric acid	short chain carbon organic acids
L-cysteine-glycine	amino acids and amides
Citramalic acid	short chain carbon organic acids
Erythrose	sugars
Hexadecylglycerol	others
Capric acid	long chain carbon organic acids
2-hydroxypentanoic acid	short chain carbon organic acids
Cholesterol	alcohols
P-hydroxylphenyllactic acid	long chain carbon organic acids
Nicotinamide	amino acids and amides
5-methoxytryptamine	others
Alkane	others
Alloxanoic acid	alcohols
Tranexamic acid	others
L-asparagine	amino acids and amides
4-hydroxybenzyl alcohol	alcohols
N-acetylputrescine	others
Salicylic acid	others
Erythritol	alcohols
5-hydroxy-hydantoin	others
Glycerol-3-galactoside	sugars
L-methionine	amino acids and amides
Pyroglutamic acid	amino acids and amides
Lysine	amino acids and amides
Allantoin	others
2-isopropylmalic acid	long chain carbon organic acids
4-aminobutyric acid	others
2-piperidinobenzonitrile	others
Arbutin	sugars
1,2,4-benzenetriol	alcohols
2,6-bis(tert-butyl)phenol	others
Erythronic acid	sugar acids
5-hydroxymethyl-2-furoic acid	others
Glucosamine	others
D-fructose	sugars
L-2-hydroxyglutaric acid	short chain carbon organic acids
Glucosaminic acid	others
1,2,3-trihydroxybenzene	others
2-aminobenzoic acid	others
L-glutamic acid	amino acids and amides
L-phenylalanine	amino acids and amides
3-hydroxybenzoic acid	others
Nicotianamine	amino acids and amides
4-aminophenol	others
Dodecanoic acid	long chain carbon organic acids
2-deoxypentonic acid	short chain carbon organic acids
D-ribose	sugars
D-arabinose	sugars
Chlorogenic acid	long chain carbon organic acids
Levoglucosan	sugars
D-fructose-1-phosphate	sugars
Resveratrol	alcohols
Tocopherol acetate	amino acids and amides
L-arabitol	sugar alcohols
6-deoxyglucose	sugars
Trehalose-6-phosphate	sugars
Pseudo uridine	nucleotides
Udp-glucuronic acid	sugar acids
3,6-anhydro-d-galactose	sugars
Glucuronic acid, methyl ester, 2-(4-chlorophenoxy)-2-methylpropanoate
Vanillic acid	others
Glycerol-alpha-phosphate	others
Ribonic acid	sugar acids
Glucose-1-phosphate	others
Methyl alpha-d-fructofuranoside	sugars
4-hydroxymandelic acid	amino acids and amides
2-keto-l-gluconate	others
Cholic acid	long chain carbon organic acids
Shikimic acid	others
Protocatechoic acid	others
D-xylose	sugars
Udp-n-acetylglucosamine	amino acids and amides
Pinitol	alcohols
Galacto-hexodialdose	others
3-deoxyhexitol	alcohols
Isomaltose	sugars
N-carbamoylaspartate	others
Myristic acid	long chain carbon organic acids
Guanosine	others
Quinic acid	others
Adenine	nucleotides
Myo-inositol	alcohols
D-tagatose	sugars
Methyl beta-d-glucopyranoside	sugars
Galactose	sugars
Pentacosanoic acid	long chain carbon organic acids
Palatinitol	sugar alcohols
Hexuronic acid	sugar acids
Chenodeoxycholic acid	long chain carbon organic acids
Galactitol	alcohols
L-tyrosine	amino acids and amides
4-hydroxycinnamic acid	long chain carbon organic acids
Digalacturonic acid	others
Scyllo-inositol	alcohols
Gallic acid	long chain carbon organic acids
Mannonic acid	sugar acids
Octadecylglycerol	others
D-mannose	sugars
Gluconic acid	sugar acids
4-hydroxy-3-methoxyphenylglycol	alcohols
Conduritol-beta-epoxide	others
Ethyl beta-d-glucopyranoside	sugars
1-hydroxy-3-methoxy-6-methylanthraquinone	others
Palmitelaidic acid	long chain carbon organic acids
Palmitic acid	others
1-butanol	alcohols
N-acetyl-d-glucosamine	sugars
Epigallocatechin	others
D6 cholesterol	alcohols
Leucrose	sugars
N-acetyl-d-hexosamine	amino acids and amides
Altrose	others
Epicatechin	others
Beta-sitosterol	alcohols
1,4-dihydroxy-2,6-dimethoxybenzene	others
Uridine	nucleotides
Melibiose	sugars
Stearic acid	long chain carbon organic acids
Oleamide	amino acids and amides
1-methylinosine	others
Catechin	others
Galactinol	alcohols
Guanidinosuccinate	short chain carbon organic acids
Glucoheptulose	sugars
Dimethyluric acid	others
Dehydroabietic acid	others
Monomyristin	esters
Formononetin	others
Inositol-4-monophosphate	others
Trisaccharide	sugars
Montanic acid	long chain carbon organic acids
Bisphosphoglycerol	short chain carbon organic acids
Piceatannol	others
2-monopalmitin	esters
Maltotriitol	sugar alcohols
1-monopalmitin	esters
Inulotriose	sugars
Adenosine	others
1-kestose	sugars
Behenic acid	long chain carbon organic acids
Maltotriose	sugars
1-monostearin	esters
Sophorose	sugars
Melezitose	sugars
Cerotinic acid	long chain carbon organic acids

## Sheet: Supplementary_Table6
Pairwise Adonis	Adonis R	Adonis P
B_D_VS_B_H	0.152	0.049
C_D_VS_C_H	0.801	0.01
L_D_VS_L_H	0.548	0.002
W_D_VS_W_H	0.294	0.01

## Sheet: Supplementary_Table7
id	group	log2_FC	Pvalue	fdr	Relative abundance of D	Relative abundance of H	Name
GCMS_104	rf001	0.70013	0.00122718	0.00122718	5.41147e-05	6.95245e-05	Spermine
GCMS_109	rf001	1.65587	0.0294409	0.0294409	1.93556e-05	1.92838e-05	Saccharopine
GCMS_110	rf001	-1.49247	1.10447e-05	1.10447e-05	0.000156447	0.000323008	Thymine
GCMS_115	rf001	-0.0696247	0.0360483	0.0360483	2.71708e-05	1.22385e-05	Cytidine-5-monophosphate
GCMS_120	rf001	-0.689421	0.0467916	0.0467916	0.000114857	6.79793e-05	Methyltetrahydrophenanthrenone
GCMS_125	rf001	-1.15847	2.04071e-05	2.04071e-05	0.000240608	0.000158404	Hexadecylglycerol
GCMS_128	rf001	1.54566	0.00234127	0.00234127	4.37184e-05	7.57843e-05	Cholesterol
GCMS_129	rf001	1.74058	0.00363883	0.00363883	3.25778e-05	3.87325e-05	P-hydroxylphenyllactic acid
GCMS_13	rf001	-0.487727	0.0143638	0.0143638	0.00011169	9.61863e-05	D7-glucose
GCMS_133	rf001	2.94868	0.00655719	0.00655719	0.000125907	0.000229508	Alloxanoic acid
GCMS_142	rf001	-2.33803	0.0090454	0.0090454	4.10329e-05	0.000258705	L-methionine
GCMS_144	rf001	-0.463336	0.000621998	0.000621998	0.000107078	0.000118476	Lysine
GCMS_164	rf001	3.78969	0.0105812	0.0105812	6.44095e-05	0.000196534	4-aminophenol
GCMS_169	rf001	0.676337	0.0207346	0.0207346	5.13698e-05	5.39659e-05	Chlorogenic acid
GCMS_173	rf001	2.55542	0.0337177	0.0337177	7.15069e-05	3.93981e-05	Tocopherol acetate
GCMS_177	rf001	1.82469	0.00978649	0.00978649	8.02024e-05	2.79651e-05	Pseudo uridine
GCMS_186	rf001	2.93226	0.00122718	0.00122718	7.30735e-05	0.000162333	4-hydroxymandelic acid
GCMS_19	rf001	-0.383419	0.0498637	0.0498637	6.07117e-05	5.53585e-05	Citrulline
GCMS_207	rf001	-0.720647	0.00213926	0.00213926	0.000139278	0.000138443	Palatinitol
GCMS_224	rf001	2.18534	9.27796e-05	9.27796e-05	7.91796e-05	0.000169676	Palmitelaidic acid
GCMS_29	rf001	-0.57371	0.0294409	0.0294409	0.000120692	0.000140456	1,2-dihydroxycylohexane
GCMS_50	rf001	-0.778491	0.000415502	0.000415502	6.10189e-05	7.98868e-05	Benzylalcohol
GCMS_52	rf001	-0.526106	0.0192924	0.0192924	5.33341e-05	6.78636e-05	Beta-hydroxymyristic acid
GCMS_53	rf001	-0.974769	0.0105812	0.0105812	3.63696e-05	6.47973e-05	2,2-biphenyldiol
GCMS_66	rf001	-0.612155	0.0090454	0.0090454	0.000196007	0.00024545	Hypoxanthine
GCMS_76	rf001	2.11563	0.0467916	0.0467916	0.000143116	0.000101777	Digitoxose
GCMS_85	rf001	-0.691808	0.00556046	0.00556046	0.000155644	0.000211667	Phenylacetic acid
GCMS_97	rf001	2.87351	3.93881e-07	3.93881e-07	2.95067e-05	5.18073e-05	Atropine
GCMS_99	rf001	1.22085	0.000222203	0.000222203	0.000143457	0.000178251	Fumaric acid
GCMS_174	rf003	1.04381	0.00256062	0.00256062	0.00263224	0.000946818	L-arabitol
GCMS_189	rf003	5.04075	0.0133205	0.0133205	0.0020471	0.0103274	Shikimic acid
GCMS_210	rf003	1.10191	0.000222203	0.000222203	0.00386866	0.00323937	Galactitol
GCMS_217	rf003	0.977114	9.27796e-05	9.27796e-05	0.00271377	0.0022291	Octadecylglycerol
GCMS_225	rf003	-0.78654	3.93881e-07	3.93881e-07	0.011805	0.0140574	Palmitic acid
GCMS_238	rf003	-0.630995	0.000144383	0.000144383	0.00689294	0.00783005	Stearic acid
GCMS_250	rf003	2.58049	0.00604033	0.00604033	0.0011455	0.00039755	Trisaccharide
GCMS_251	rf003	-0.602851	0.000509073	0.000509073	0.00268248	0.0023291	Montanic acid
GCMS_256	rf003	-0.753581	0.000103734	0.000103734	0.0345121	0.029624	1-monopalmitin
GCMS_260	rf003	-0.688049	0.00037499	0.00037499	0.00402375	0.00317718	Behenic acid
GCMS_265	rf003	-0.62085	0.00256062	0.00256062	0.00179135	0.0017068	Cerotinic acid
GCMS_28	rf003	1.96591	0.0467916	0.0467916	0.005764	0.00592648	Glycolic acid
GCMS_43	rf003	-0.590495	0.00511526	0.00511526	0.00206496	0.00169747	L-alanine-alanine
GCMS_64	rf003	-2.52909	6.91658e-07	6.91658e-07	0.00352954	0.0123996	L-valine
GCMS_77	rf003	-1.09161	4.16576e-05	4.16576e-05	0.00222398	0.003619	Ethanolamine
GCMS_82	rf003	-2.48547	0.000460073	0.000460073	0.00192105	0.00667849	L-isoleucine
GCMS_87	rf003	-1.09688	0.00256062	0.00256062	0.00146073	0.00298986	Glycine
